# Supplementary material for: Transformation of nanoparticles into hydrogels for long-acting and sensitized apoptosis therapy of triple negative breast cancer
Source: Royal Society of Chemistry journal article supplement (doi:10.1039/d5bm01226k), 2025-11-27
Supplement: d5bm01226k1.pdf [file d5bm01226k1.pdf]

Supplementary data

# Transformation of Nanoparticles into Hydrogel for Long-acting and Sensitized Apoptosis Therapy of Triple Negative Breast Cancer

Linna Yu <sup>a,b</sup>, Jianping Zhou <sup>a,\*</sup>, Hao Cheng <sup>a,\*</sup>, Yang Ding <sup>a,\*</sup>

*<sup>a</sup> State Key Laboratory of Natural Medicines, Department of Pharmaceutics, China Pharmaceutical University, Nanjing 210009, PR China*

*<sup>b</sup> People's Hospital of Qianxinan Prefecture, Xingyi 562400, China*

\*Corresponding authors.

E-mail addresses: dydszyzf@163.com (Yang Ding), chenghao@cpu.edu.cn (Hao Cheng), zhoujianping@cpu.edu.cn (Jianping Zhou)

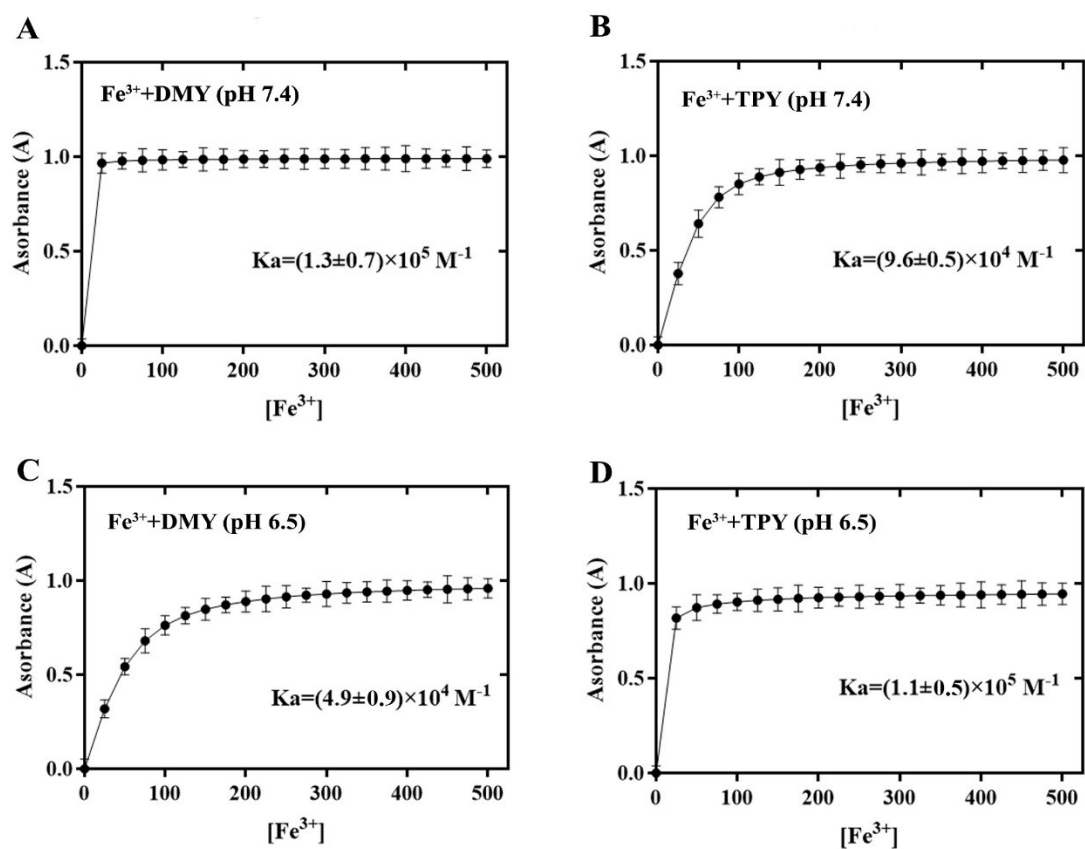

**Figure S1.** The affinity curve of  $\text{Fe}^{3+}$  with DMY at pH 7.4 (A),  $\text{Fe}^{3+}$  with TPY at pH 7.4 (B),  $\text{Fe}^{3+}$  with DMY at pH 6.5 (C) and  $\text{Fe}^{3+}$  with TPY at pH 6.5 (D).

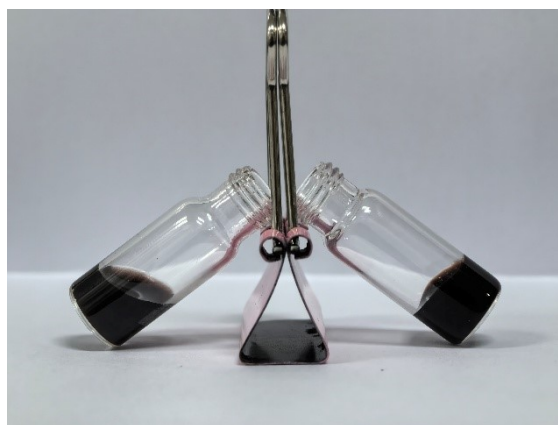

**Figure S2.**  $\text{SF}_{\text{sTRAIL}}@\text{MPN}$  gelation transition from pH 7.4 (L) to pH 6.5 (R).

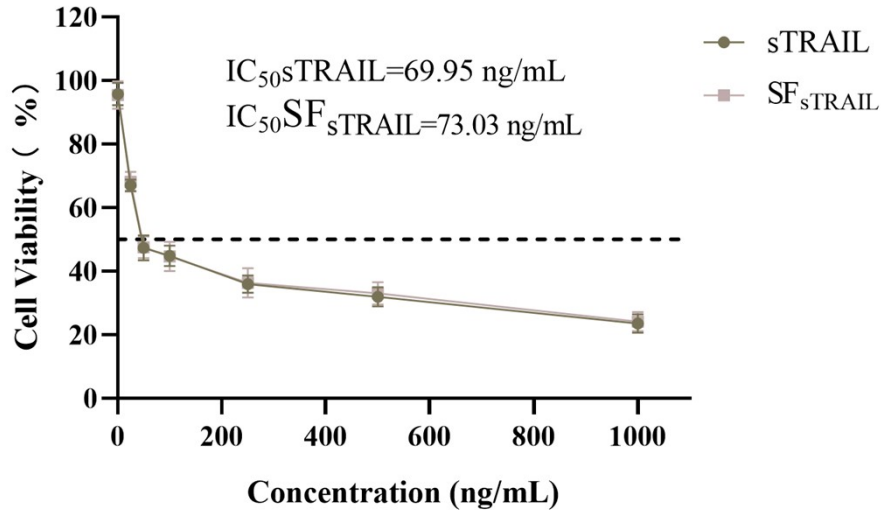

**Figure S3.** Cell viability and IC<sub>50</sub> of sTRAIL. (n=5).

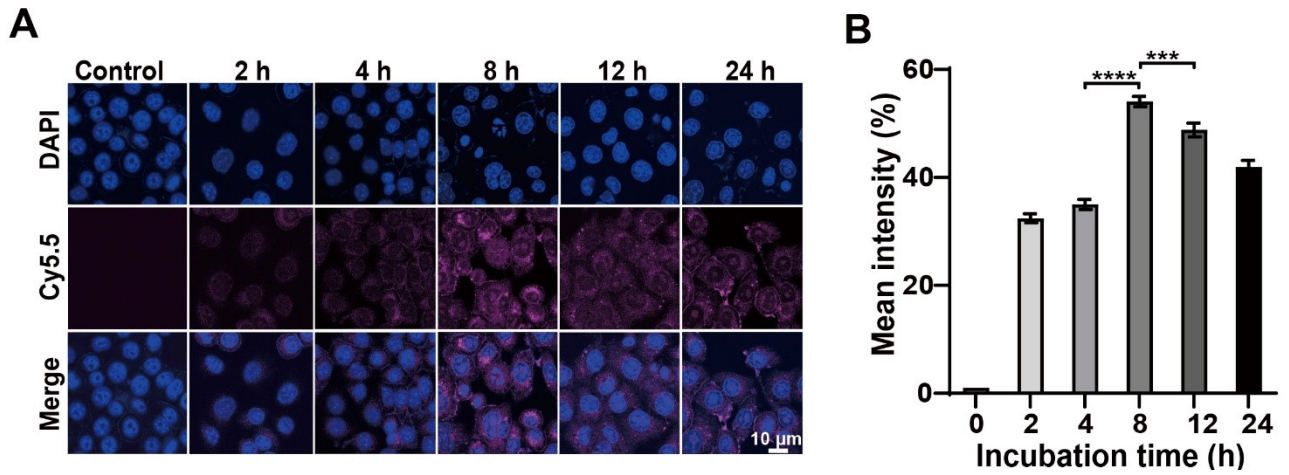

**Figure S4.** (A) Examination of binding ability of sTRAIL in SF<sub>s</sub>TRAIL@MPN by 4T1 cells at pH7.4; (B) Fluorescence quantification analysis of binding ability at pH 7.4. Bar = 10 μm.

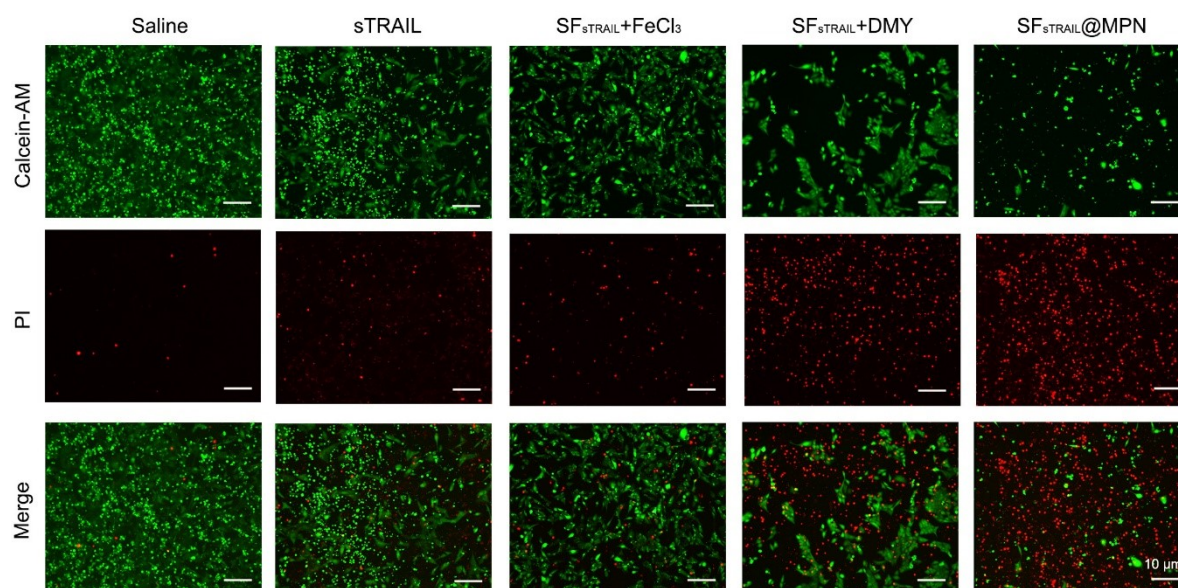

**Figure S5.** Live/dead viability staining of SF<sub>sTRAIL</sub>@MPN. Bar = 10  $\mu$ m.

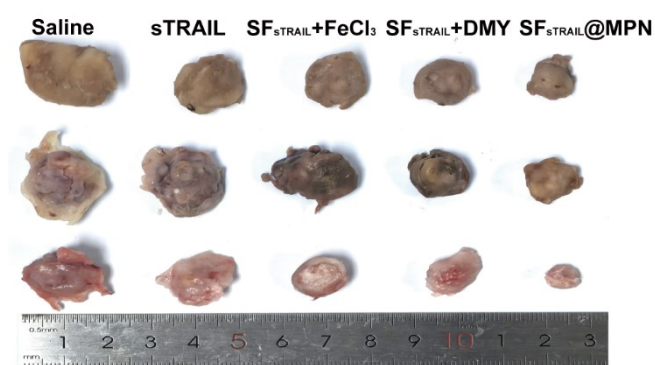

**Figure S6.** Individual tumor growth of Saline, SF<sub>sTRAIL</sub>, SF<sub>sTRAIL</sub> + FeCl<sub>3</sub>, SF<sub>sTRAIL</sub> + DMY and SF<sub>sTRAIL</sub>@MPN in 4T1 tumor-bearing mice. (n = 3). \*\*\*\*  $p < 0.0001$ , \*\*  $p < 0.01$ .

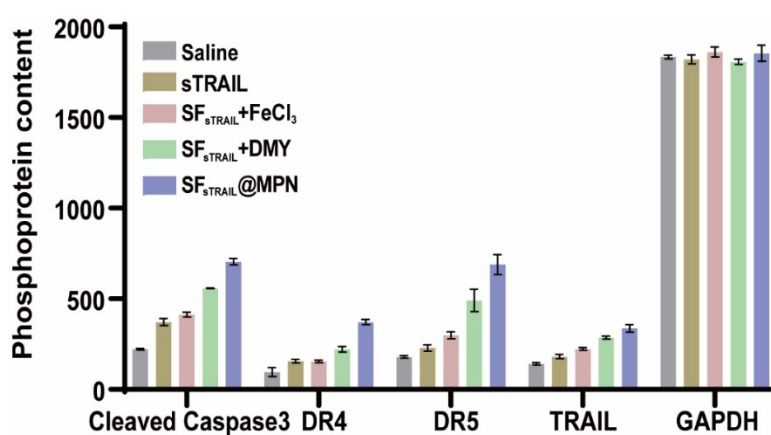

**Figure S7.** (A) Quantitative analysis of expression of Cleaved Caspase-3, TRAIL, DR4 and DR5 in tumor tissues collected from different groups (n = 3).

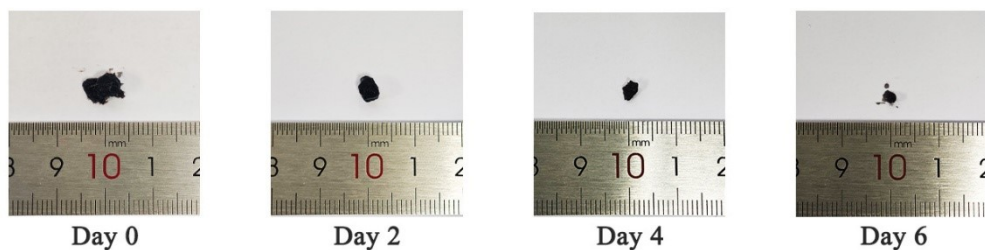

**Figure S8.** Biodegradation of SF<sub>sTRAIL</sub>@MPN for 0, 2, 4, 6 days.

**Table S1.** Interaction sites of Silk Fibroin and TRAIL

| Silk fibroin interface residue | TRAIL interface residue | Hydrogen Bonds(Å) |
|--------------------------------|-------------------------|-------------------|
| ASP 181A                       | LEU 243D                | 2.923             |
| GLN 224A                       | TYR 187D                | 2.911             |
| GLN 224A                       | TYR 189D                | 2.941             |
| GLN 224A                       | TYR 247D                | 3.071             |
| TYR 252A                       | LEU 251D                | 3.079             |
| GLN 255A                       | ILE 284D                | 2.941             |

**Table S2.** Interaction sites of Dihydromyricetin with Silk Fibroin and TRAIL

| Ligand           | Target       | Binding Energy<br>(Kcal/mol) | Ki (μM) |
|------------------|--------------|------------------------------|---------|
| Dihydromyricetin | Silk fibroin | -7.5                         | 3.1     |
| Dihydromyricetin | TRAIL        | -6.9                         | 8.6     |

**Table S3.** Binding constants (K<sub>a</sub>) of Fe<sup>3+</sup> with DMY and TPY at different pH values

| Ligands | pH value | K <sub>a</sub> (10 <sup>4</sup> M <sup>-1</sup> ) |
|---------|----------|---------------------------------------------------|
| DMY     | 7.4      | 13 ± 7                                            |
| DMY     | 6.5      | 4.93 ± 0.86                                       |
| TPY     | 7.4      | 9.6 ± 0.513                                       |
| TPY     | 6.5      | 11.5 ± 4.6                                        |

**Table S4.** Interaction sites of Dihydromyricetin with Silk Fibroin and TRAIL

| Test indicators                      | pH 6.8 | pH 6.0 |
|--------------------------------------|--------|--------|
| Viscosity (cP)                       | 2.55   | 32.85  |
| Torque (%)                           | 1.7    | 21.9   |
| Shear stress (dyne/cm <sup>2</sup> ) | 1.73   | 22.34  |

**Table S4.** qPCR primer design for Cleaved Caspase-3, TRAIL, DR4 and DR5.

| Gene              | Forward Primer        | Reward Primer        |
|-------------------|-----------------------|----------------------|
| Cleaved Caspase-3 | CTGGCGTGTGCGAGATGAG   | CTTAGCGTTCCAAGCTCCCC |
| TRAIL             | CCTCTCGGAAAGGGCATTCA  | CTGCACCAGCTGTTTGGTTC |
| DR4               | TGCTCATCGGCTTGGTGTTG  | AGTAGTTGGTGGGTGTCTGC |
| DR5               | GCGAACTCTGTGCATTTCGTC | TCGTCAGCTGAGTCGTTTCC |
